# Supplementary material for: Targeting HNRNPU to overcome cisplatin resistance in bladder cancer
Source: Springer Nature journal article supplement (doi:10.1186/s12943-022-01517-9), 2022-02-07
Supplement: MOESM1 [file 20108208]

1 **Supplementary Materials**

2

3

4

5

6

7

8

9

10

11

12

13

14

15

16

17

18

19

20

21

22

23

24

25

26

27

28

29

30

31

32

33

34

35

36

37

38

39

40

41

42

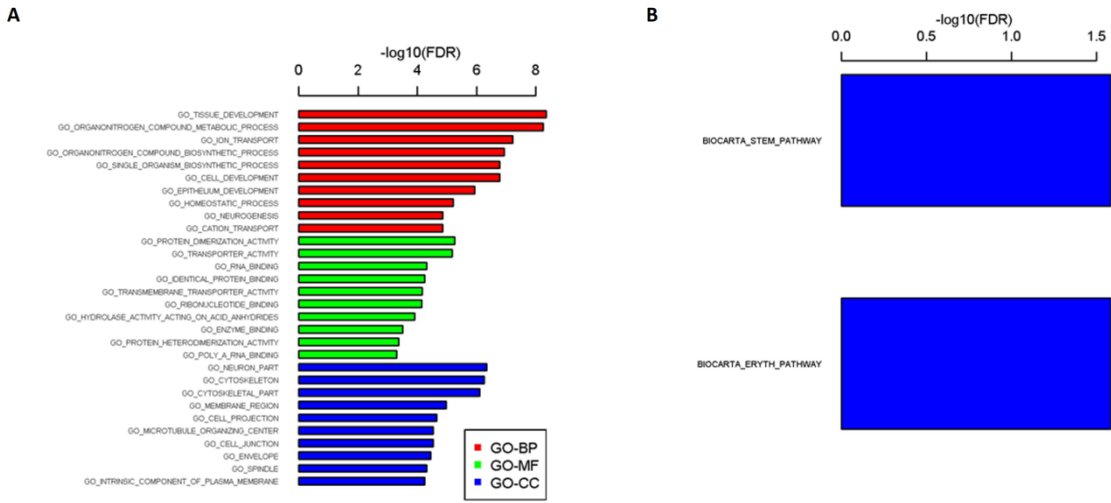

17 **Supplementary Figure 1.** Pathways related to the CRISPR-Cas9 screen investigating mediators of  
18 cisplatin response in T24 cells. (A) Top GO analysis and (B) pathway analysis of the 327 regulated genes  
19 in T24 cells after CRISPR-cas9 genome editing.

43  
44  
45  
46  
47  
48  
49  
50  
51  
52  
53  
54  
55  
56  
57  
58  
59  
60  
61  
62  
63  
64  
65  
66  
67  
68  
69  
70  
71  
72  
73  
74  
75  
76  
77  
78  
79  
80  
81  
82  
83  
84  
85

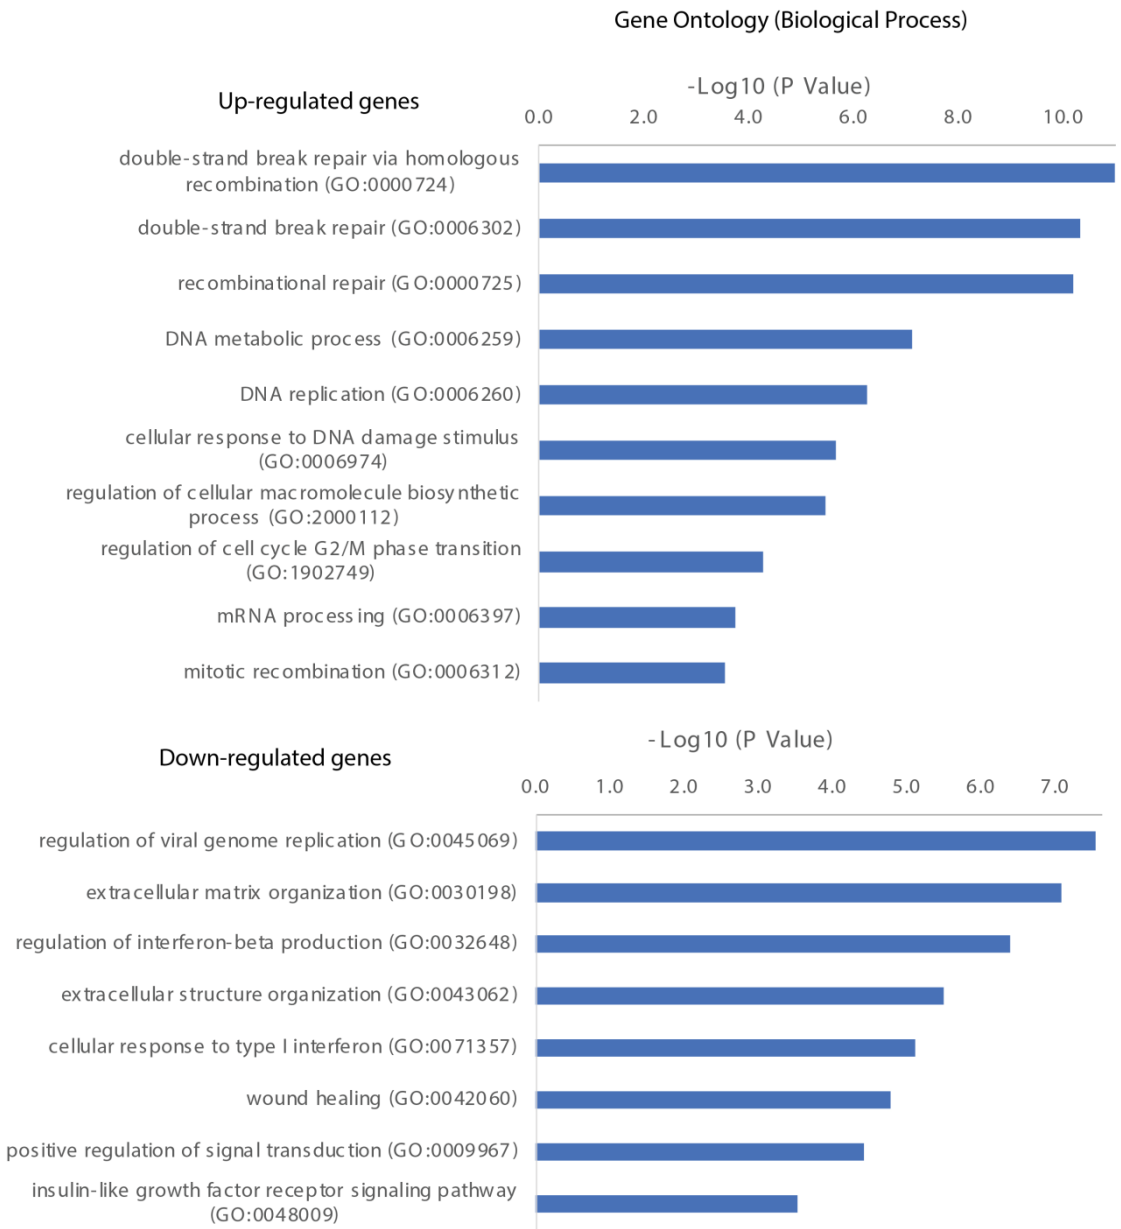

**Supplementary Figure 2.** Gene ontology pathway enrichment of the microarray data. Enrichment of both upregulated and downregulated DEG (differentially expressed genes) is shown.

86  
87  
88  
89  
90  
91  
92  
93  
94  
95  
96  
97  
98  
99  
100  
101  
102  
103  
104  
105  
106  
107  
108  
109  
110  
111  
112  
113  
114  
115  
116  
117  
118  
119  
120  
121  
122  
123  
124  
125  
126  
127  
128  
129

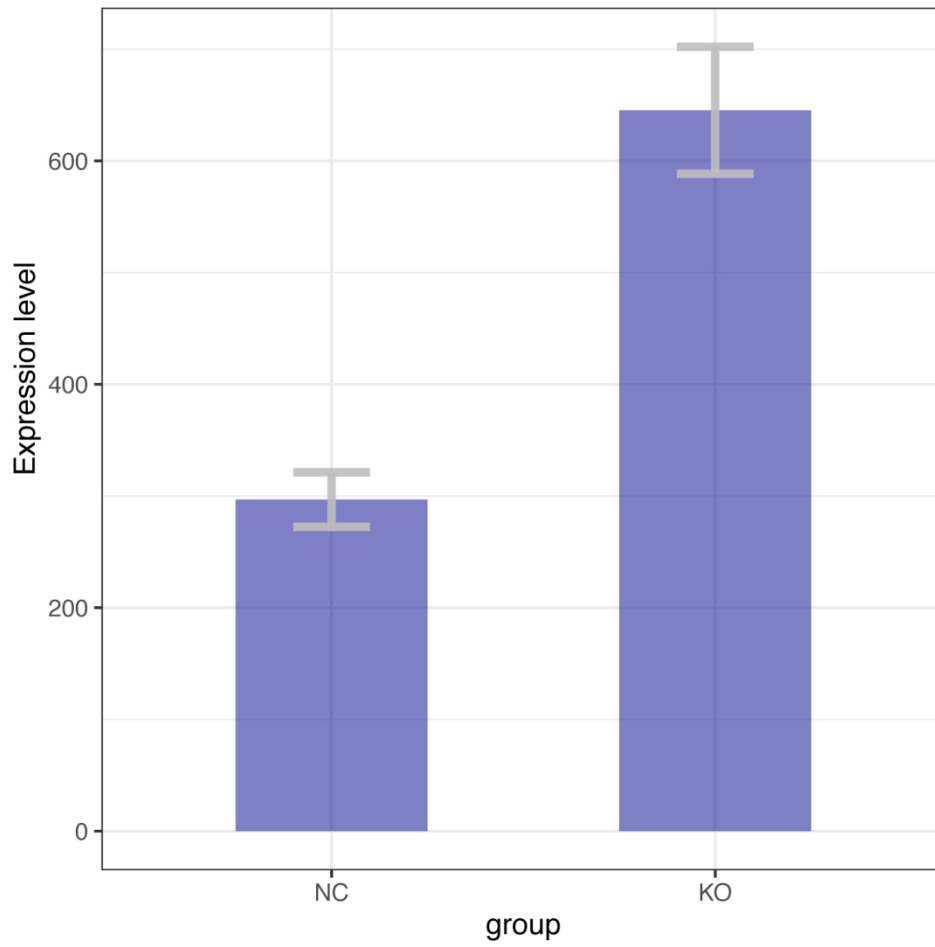

**Supplementary Figure 3.** AHCTF1 expression profile from HNRNPU-KO microarray dataset.

130  
 131  
 132  
 133  
 134  
 135  
 136  
 137  
 138  
 139  
 140  
 141  
 142  
 143  
 144  
 145  
 146  
 147  
 148  
 149  
 150  
 151  
 152  
 153  
 154  
 155  
 156  
 157  
 158  
 159  
 160  
 161  
 162  
 163  
 164  
 165  
 166  
 167  
 168  
 169  
 170  
 171

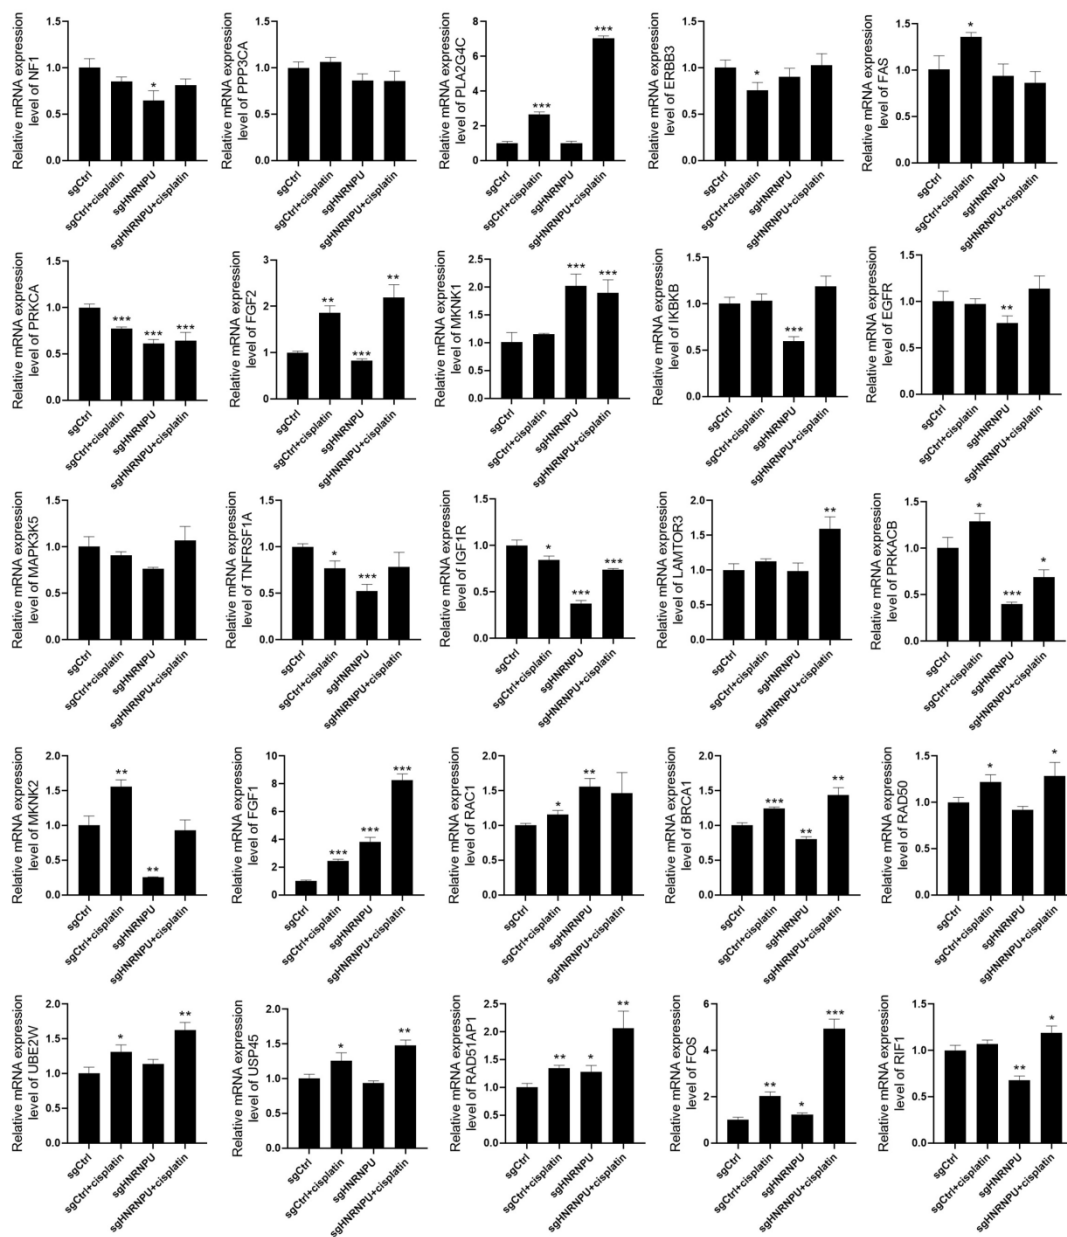

**Supplementary Figure 4.** Validation of the MAPK pathway and DNA double-strand break repair gene expressed in the HNRNPU-depleted cells after cisplatin treatment. T24 cells were transfected with sgHNRNPU and then treated with cisplatin for 5 days. The qRT-PCR assay was used to detect the mRNA expression of genes. The data indicate mean  $\pm$  SD from three independent experiments. The data indicate mean  $\pm$  SD from three independent experiments. \*p<0.05, \*\*p<0.01, \*\*\*p<0.001 vs. the sgCtrl group.

172  
 173  
 174  
 175  
 176  
 177  
 178  
 179  
 180  
 181  
 182  
 183  
 184  
 185  
 186  
 187  
 188  
 189  
 190  
 191  
 192  
 193  
 194  
 195  
 196  
 197  
 198  
 199  
 200  
 201  
 202  
 203  
 204  
 205  
 206  
 207  
 208  
 209  
 210  
 211  
 212  
 213

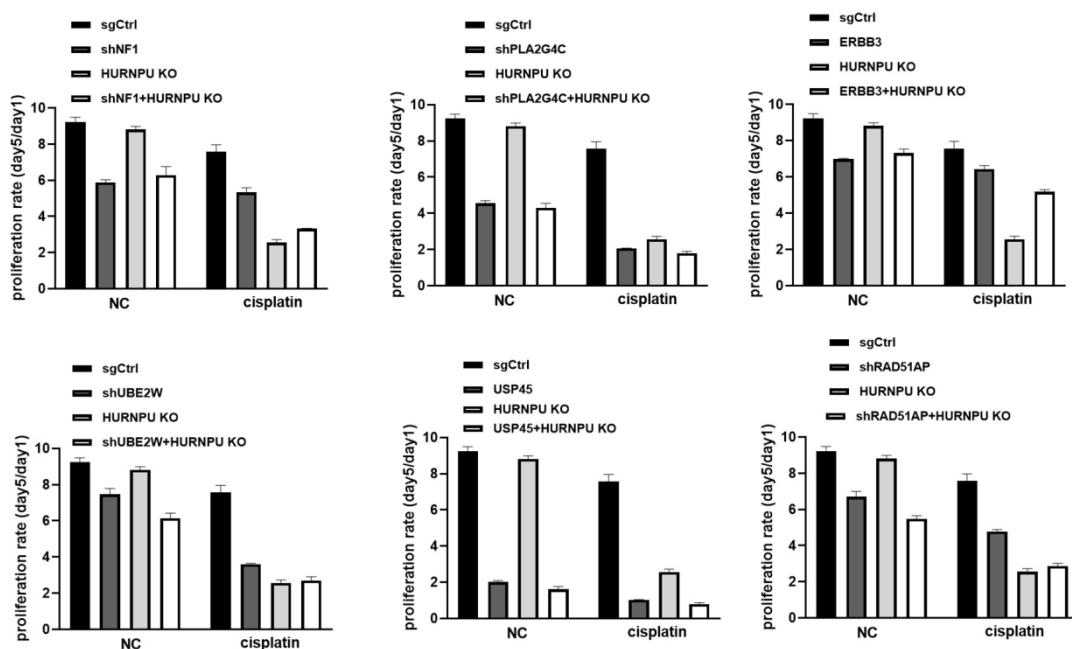

**Supplementary Figure 5.** Screening of HNRNPU downstream genes. T24 cells were transfected with sgHNRNPU, with or without the downstream gene knockdown or overexpression, and then treated with or without cisplatin for 5 days. The CCK-8 assay was used to detect the cell proliferation in the indicated group.

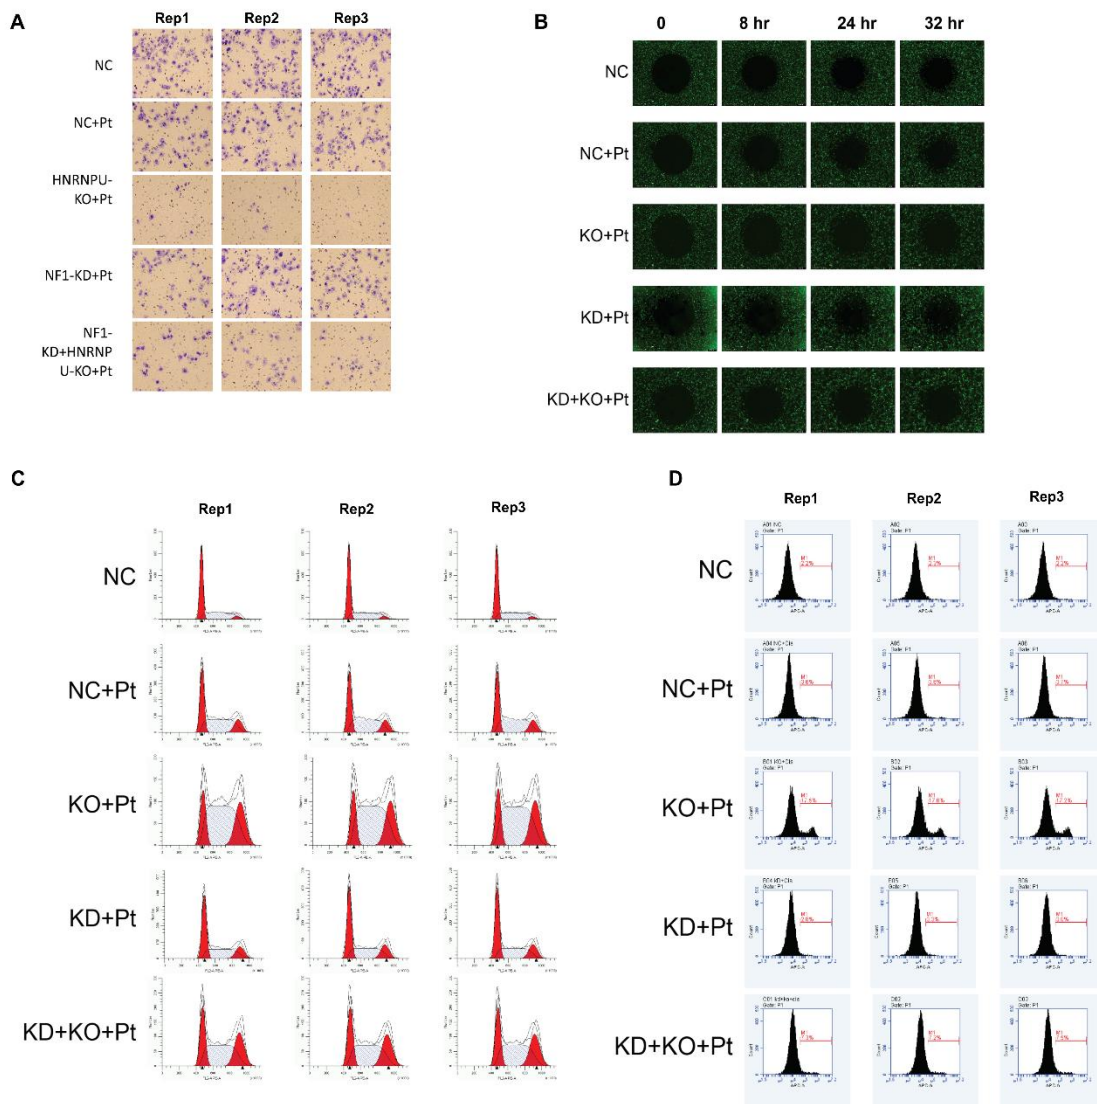

215

216

217 **Supplementary Figure 6.** A. Cell invasion assay results under different NF1, HNRNPU KO or

218 combination treatments. Rep = replication. **B.** Cell migration assay results under different NF1,

219 HNRNPU KO or combination treatments. Hr= hour. **C.** Cell cycle arrest results under different NF1,

220 HNRNPU KO or combination treatments. Rep = replication. **D.** Cell apoptosis results under different

221 NF1, HNRNPU KO or combination treatments. Rep = replication.

222

223

224

225

226

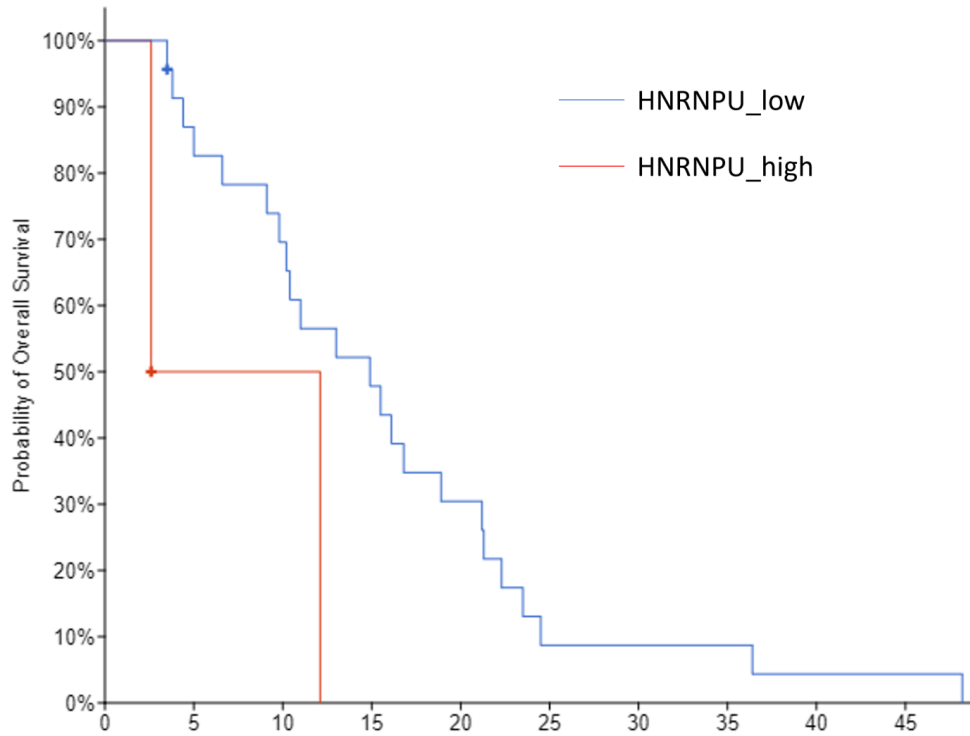

227

228 **Supplementary Figure 7. Survival outcome of patients with low HNRNPU (blue line) and high**

229 **HNRNPU expression (red line). Data was from Iyer et al., 2013, total case number = 59.**

230

231

232

233

**Supplementary Table S1. Primers of genes for RT-PCR.**

| Gene     | Sequences                                                       |
|----------|-----------------------------------------------------------------|
| NF1      | F 5'-TCCATCCCCTTTATCCCAGCC-3'<br>R 5'-CCAGTTAGGAGGGTCACGGA-3'   |
| PPP3CA   | F 5'-GCCGCGGACCTTCTAGGATA-3'<br>R 5'-TGACGCCCCCGTCAATAAAA-3'    |
| PLA2G4C  | F 5'-CACGTGATCCCACGGATGAA-3'<br>R 5'-TGCACCCAATCCCTGGTACT-3'    |
| ERBB3    | F 5'-CTTGCCTCGATGTCCTAGCC-3'<br>R 5'-CTGAGACCGTGCCCATACC-3'     |
| FAS      | F 5'-CAAGAATTGCCAGGCGAACAA-3'<br>R 5'-TTGCATCCCAAACAGAGCCA-3'   |
| PRKCA    | F 5'-AAGAACGTGCACGAGGTGAA-3'<br>R 5'-CCCGCCGGTCCAAGTTATC-3'     |
| FGF2     | F 5'-TCCATTTCGTGGGTCTCTCG-3'<br>R 5'-AAATTGGCACACCCCAAAGC-3'    |
| FOS      | F 5'-GCGGTAGGTACTCTGTGGGT-3'<br>R 5'-AGGTTGGCAATCTCGGTCTG-3'    |
| MKNK1    | F 5'-GTTCTCGGAGGAGCGATCTG-3'<br>R 5'-GAAAAGCGTCCCTTAGGCT-3'     |
| IKKBK    | F 5'-GGTCACCTTCCCTGACAACG-3'<br>R 5'-GTCCCAAGATGACCAAAGCCA-3'   |
| EGFR     | F 5'-CCAGTATTGATCGGGAGAGCC-3'<br>R 5'-CGCAGCTGATCTCAAGGAAA-3'   |
| MAPK3K5  | F 5'-CTTTGGAGAAACCACCGTGC-3'<br>R 5'-TAAATGCTTCCCGCCAGAA-3'     |
| TNFRSF1A | F 5'-CTATGCCCGAGTCTCAACCC-3'<br>R 5'-CCCTTTGTCCCTGGTCTCAC-3'    |
| IGF1R    | F 5'-GTTTTTGGAGGGGGAGCGAA-3'<br>R 5'-GCCCCTCGGAGGAAAAGTT-3'     |
| LAMTOR3  | F 5'-GGCTTGAGGAGGAACCTGTC-3'<br>R 5'-GGCCTCAAACAGGCAAAG-3'      |
| PRKACB   | F 5'-TTGTCCAGACTGTGGAGTG-3'<br>R 5'-GCCTTCAACTACCGCTCTC-3'      |
| MKNK2    | F 5'-TTCCACCGTTCGTTCAAGGT-3'<br>R 5'-GAGCCGATCTTAGGGGCG-3'      |
| FGF1     | F 5'-CTGCAGCTGTCCTGGTAGAA-3'<br>R 5'-GCCAAGCAGAAAGTCTGTAGC-3'   |
| RAC1     | F 5'-AGCAAGCGCTCTTGAGATT-3'<br>R 5'-TATGATCGACTTGACCGCCG-3'     |
| BRCA1    | F 5'-TCCCATCTGGTAAGTCAGCAC-3'<br>R 5'-CCGGACCACAGGATTTGTGT-3'   |
| RIF1     | F 3'-AGTTTTGCCAGTTGACTCAAAGC-3'<br>R 5'-TGCCCCTAGGCAACTTTAGG-3' |
| RAD50    | F 5'-ACGATCCAAGGTAATGGTGC-3'<br>R 5'-GTGCTAAAACGTGTGGGGC-3'     |
| UBE2W    | F 5'-TGTCAGTGCCTCAACCAT-3'<br>R 5'-GTAGAGCGTCCCCAGCATTT-3'      |
| USP45    | F 5'-GGGCTTTTGCATAGCCTGTT-3'<br>R 5'-CCATTTGAGGCAAAGGGCA-3'     |
| RAD51AP1 | F 5'-AACTTGGGCAGAGTCATAGGTC-3'<br>R 5'-GTGCTGGGTCTGTCAAAC-3'    |

234

235

236

237

238 **Supplementary Table S2. Student's t-test results of Figure 4G with indicated comparison.**

239

240



| T-TEST_tumor weight          | P VALUE     |
|------------------------------|-------------|
| NC VS NC+Cisplatin           | 0.496145642 |
| NC VS KO                     | 0.87067181  |
| NC VS KO+Cisplatin           | 0.00069077  |
| NC+Cisplatin VS KO           | 0.426861325 |
| NC+Cisplatin VS KO+Cisplatin | 0.010703857 |
| KO VS KO+Cisplatin           | 0.000833118 |

241

242

243 **Supplementary Table S3. Drug sensitivity of bladder cancer cell lines to chemotherapeutic drugs.**

244

| Treatment | IC <sub>50</sub> values ± SD <sup>a</sup> (μM) |             |             |
|-----------|------------------------------------------------|-------------|-------------|
|           | Cisplatin                                      | Doxorubicin | Paclitaxel  |
| T24       | 7.637±0.980                                    | 0.341±0.043 | 0.066±0.013 |
| RT4       | 7.426±0.840                                    | 0.193±0.002 | 0.337±0.110 |
| HT1197    | 4.493±0.777                                    | 0.266±0.010 | 0.301±0.051 |
| SW780     | 3.856±0.279                                    | 0.135±0.009 | 0.029±0.002 |
| RT112     | 3.966±0.445                                    | 0.094±0.007 | <1 nM       |
| HT1376    | 3.181±0.034                                    | 0.300±0.115 | 0.258±0.086 |

245 <sup>a</sup> IC<sub>50</sub> values are represented as the mean ± SD of at least three independent experiments.
